# Supplementary material for: Efficient and low roll-off deep-blue organic light-emitting diodes with anthracene-based compounds as hosts
Source: Royal Society of Chemistry journal article supplement (doi:10.1039/d3nj04686a), 2023-12-23

## Supporting Information

### **Efficient and low roll-off deep-blue organic light-emitting diodes with anthracene-based compounds as hosts**

Tong Sun<sup>a</sup>, Xinfeng Shui<sup>d</sup>, Weian Chen<sup>b</sup>, Yi Chen<sup>c</sup>, Wei Shi<sup>b</sup>, Jinhai Huang<sup>c</sup>, Bin Wei<sup>b</sup>

<sup>a</sup> *School of Materials Science and Engineering, Shanghai University, Shanghai 200072, China.*

<sup>b</sup> *School of Mechatronic Engineering and Automation, Key Laboratory of Advanced Display and System Applications, Ministry of Education, Shanghai University, 200072, Shanghai, People's Republic of China.*

<sup>c</sup> *Shanghai Taoe Chemical Technology Co., Ltd, Shanghai, PR China.*

<sup>d</sup> *Anhui Sholon New Material Technology Co., Ltd. Chuzhou, Anhui Province 239500, P. R. China*

**Fig. S1.**  $^1\text{H}$  NMR spectrum of (a) NA-AN-NA, (b) NA-AN-1-DBF, (c) PH-AN-1-DBF, and (d) PH-AN-2-DBF

(a)

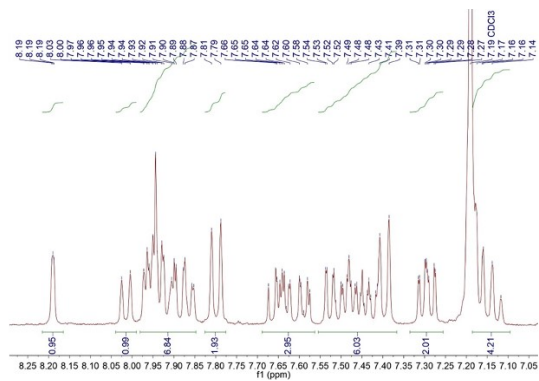

(b)

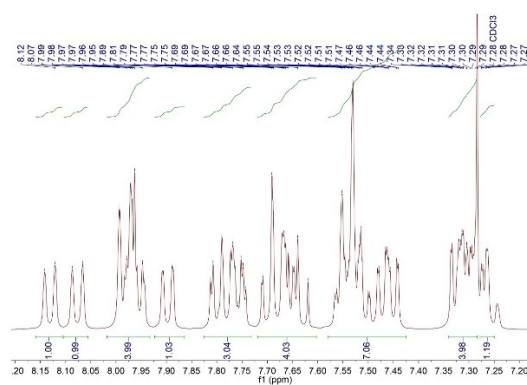

(c)

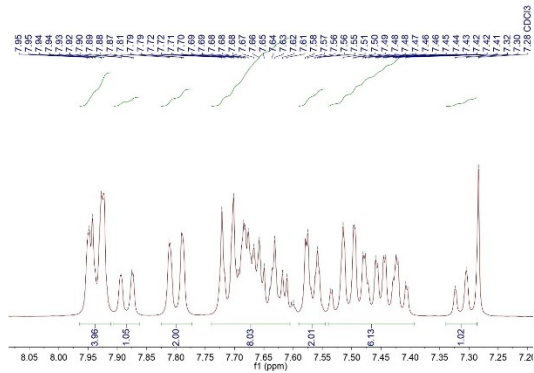

(d)

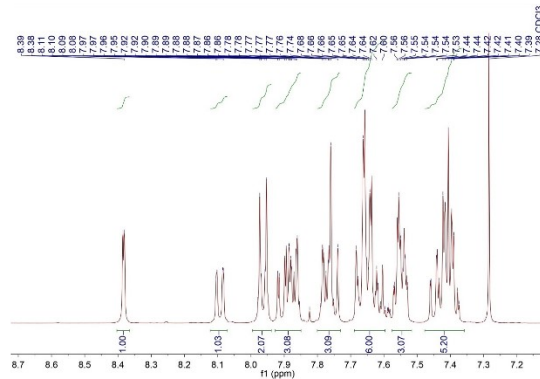

**Fig. S2.**  $^{13}\text{C}$  NMR spectrum of (a) NA-AN-1-DBF, (b) PH-AN-1-DBF, and (c) PH-AN-2-DBF.

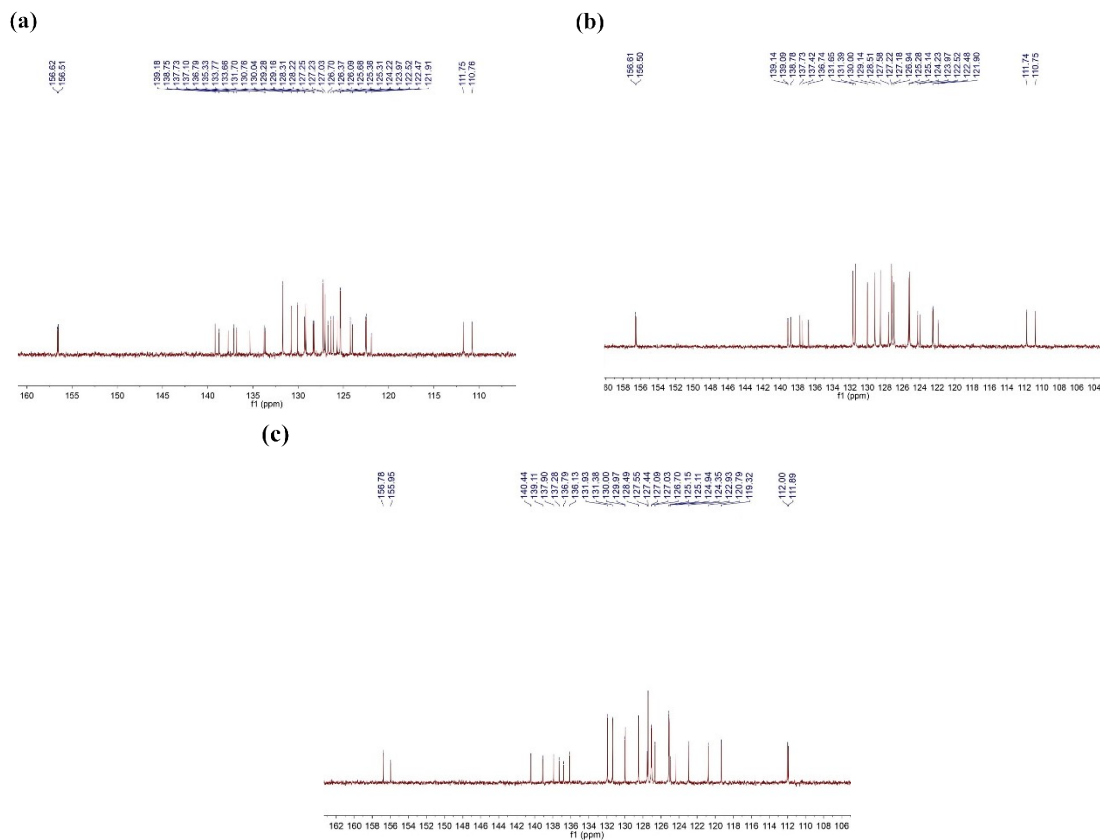

**Fig. S3.** HRMS spectrum of (a) NA-AN-1-DBF, (b) PH-AN-1-DBF and (c) P H-AN-2-DBF.

(a)

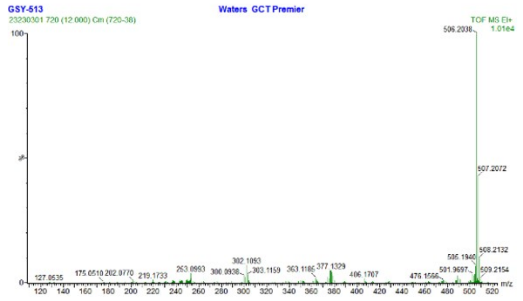

(b)

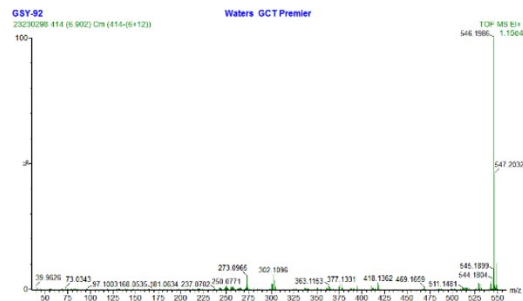

(c)

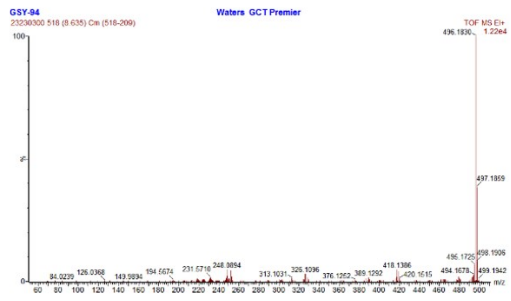

(d)

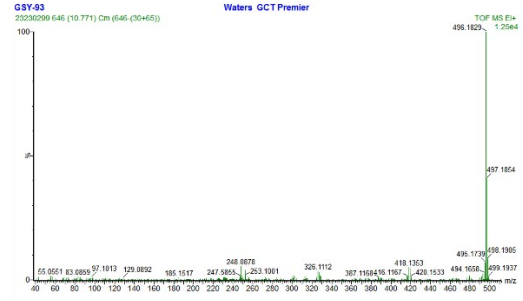

**Fig. S4.** The LTPL spectra of NA-AN-NA, NA-AN-1-DBF, Ph-AN-1-DBF, and Ph-AN-2-DBF.

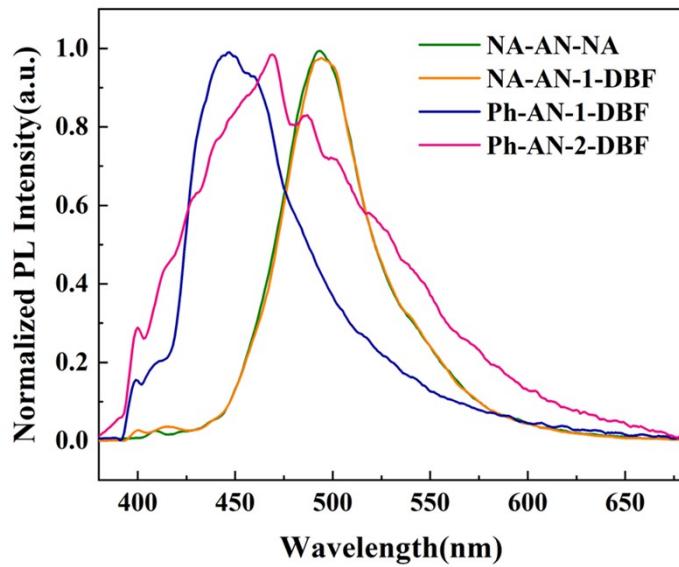

**Fig. S5.** UV-vis-near-IR spectra of NA-AN-NA, NA-AN-1-DBF, Ph-AN-1-DBF, and Ph-AN-2-DBF at 298 K.

(a)

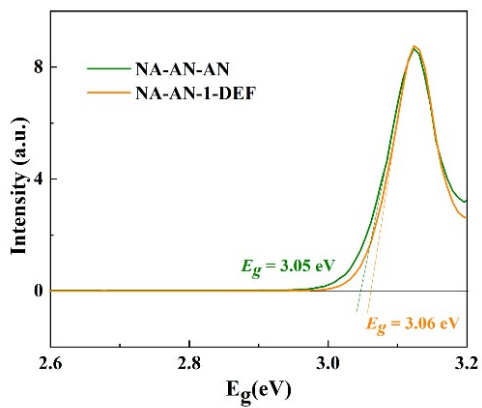

(b)

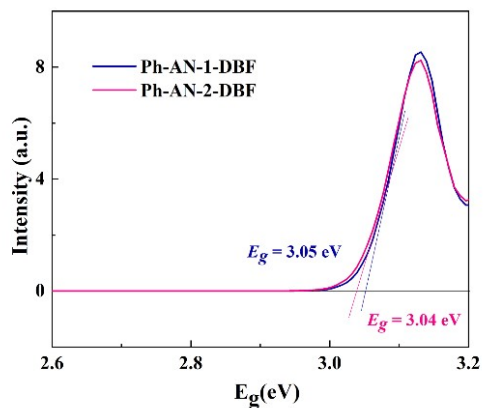

**Fig. S6.** EQE-L characteristics of devices.

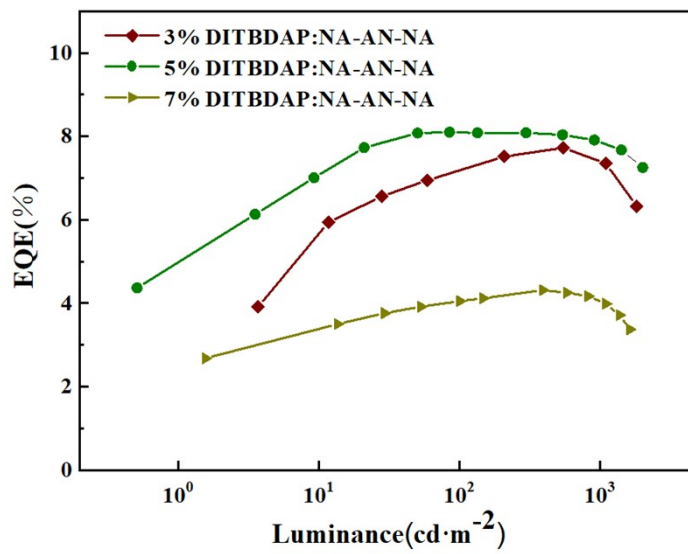

Supplement: d3nj04686a1.pdf [file d3nj04686a1.pdf]
